# Supplementary material
Source: PubMed Central journal article supplement (PMC5811231)
Supplement: NIHMS940305-supplement-Prototypical_Waveforms_Data_pdf.pdf [file NIHMS940305-supplement-Prototypical_Waveforms_Data_pdf.pdf]

| Group1   |              | Group2   |              | Group3   |              | Group4   |              |
|----------|--------------|----------|--------------|----------|--------------|----------|--------------|
| t [s]    | vp(t) [cm/s] |
| 0.00E+00 | 2.63E+01     | 0.00E+00 | 2.19E+01     | 0.00E+00 | 2.69E+01     | 0.00E+00 | 2.34E+01     |
| 9.19E-03 | 2.74E+01     | 1.00E-02 | 2.23E+01     | 8.38E-03 | 2.77E+01     | 8.48E-03 | 2.45E+01     |
| 1.84E-02 | 2.81E+01     | 2.00E-02 | 2.30E+01     | 1.68E-02 | 2.76E+01     | 1.70E-02 | 2.78E+01     |
| 2.76E-02 | 2.92E+01     | 3.00E-02 | 2.41E+01     | 2.52E-02 | 2.75E+01     | 2.55E-02 | 2.99E+01     |
| 3.68E-02 | 3.12E+01     | 4.00E-02 | 2.88E+01     | 3.35E-02 | 2.86E+01     | 3.39E-02 | 3.43E+01     |
| 4.60E-02 | 3.59E+01     | 5.00E-02 | 3.78E+01     | 4.19E-02 | 2.96E+01     | 4.24E-02 | 4.11E+01     |
| 5.52E-02 | 4.23E+01     | 6.00E-02 | 4.71E+01     | 5.03E-02 | 3.11E+01     | 5.09E-02 | 4.45E+01     |
| 6.43E-02 | 5.02E+01     | 7.00E-02 | 5.56E+01     | 5.87E-02 | 3.51E+01     | 5.94E-02 | 4.78E+01     |
| 7.35E-02 | 5.61E+01     | 8.00E-02 | 6.24E+01     | 6.71E-02 | 4.14E+01     | 6.79E-02 | 5.28E+01     |
| 8.27E-02 | 6.10E+01     | 9.00E-02 | 6.94E+01     | 7.55E-02 | 4.80E+01     | 7.64E-02 | 5.96E+01     |
| 9.19E-02 | 6.60E+01     | 1.00E-01 | 7.90E+01     | 8.38E-02 | 5.50E+01     | 8.48E-02 | 7.57E+01     |
| 1.01E-01 | 6.94E+01     | 1.10E-01 | 9.03E+01     | 9.22E-02 | 6.14E+01     | 9.33E-02 | 9.86E+01     |
| 1.10E-01 | 7.22E+01     | 1.20E-01 | 9.84E+01     | 1.01E-01 | 6.64E+01     | 1.02E-01 | 1.05E+02     |
| 1.19E-01 | 7.39E+01     | 1.30E-01 | 9.55E+01     | 1.09E-01 | 7.10E+01     | 1.10E-01 | 1.05E+02     |
| 1.29E-01 | 7.53E+01     | 1.40E-01 | 9.47E+01     | 1.17E-01 | 7.40E+01     | 1.19E-01 | 8.62E+01     |
| 1.38E-01 | 7.50E+01     | 1.50E-01 | 9.51E+01     | 1.26E-01 | 7.68E+01     | 1.27E-01 | 7.54E+01     |
| 1.47E-01 | 7.44E+01     | 1.60E-01 | 9.88E+01     | 1.34E-01 | 7.83E+01     | 1.36E-01 | 7.27E+01     |
| 1.56E-01 | 7.52E+01     | 1.70E-01 | 1.00E+02     | 1.43E-01 | 7.86E+01     | 1.44E-01 | 7.46E+01     |
| 1.65E-01 | 7.62E+01     | 1.80E-01 | 9.96E+01     | 1.51E-01 | 7.81E+01     | 1.53E-01 | 7.24E+01     |
| 1.75E-01 | 7.78E+01     | 1.90E-01 | 9.91E+01     | 1.59E-01 | 7.72E+01     | 1.61E-01 | 6.29E+01     |
| 1.84E-01 | 8.00E+01     | 2.00E-01 | 9.86E+01     | 1.68E-01 | 7.65E+01     | 1.70E-01 | 5.66E+01     |
| 1.93E-01 | 8.11E+01     | 2.10E-01 | 1.01E+02     | 1.76E-01 | 7.54E+01     | 1.78E-01 | 5.42E+01     |
| 2.02E-01 | 8.19E+01     | 2.20E-01 | 1.02E+02     | 1.84E-01 | 7.39E+01     | 1.87E-01 | 5.30E+01     |
| 2.11E-01 | 8.19E+01     | 2.30E-01 | 1.02E+02     | 1.93E-01 | 7.26E+01     | 1.95E-01 | 5.00E+01     |
| 2.21E-01 | 8.23E+01     | 2.40E-01 | 9.98E+01     | 2.01E-01 | 7.16E+01     | 2.04E-01 | 4.98E+01     |
| 2.30E-01 | 8.30E+01     | 2.50E-01 | 9.69E+01     | 2.10E-01 | 7.08E+01     | 2.12E-01 | 5.00E+01     |
| 2.39E-01 | 8.36E+01     | 2.60E-01 | 9.94E+01     | 2.18E-01 | 6.90E+01     | 2.21E-01 | 4.88E+01     |
| 2.48E-01 | 8.40E+01     | 2.70E-01 | 1.00E+02     | 2.26E-01 | 6.77E+01     | 2.29E-01 | 4.69E+01     |
| 2.57E-01 | 8.49E+01     | 2.80E-01 | 9.91E+01     | 2.35E-01 | 6.77E+01     | 2.38E-01 | 4.55E+01     |
| 2.67E-01 | 8.59E+01     | 2.90E-01 | 9.71E+01     | 2.43E-01 | 6.64E+01     | 2.46E-01 | 4.53E+01     |
| 2.76E-01 | 8.60E+01     | 3.00E-01 | 9.60E+01     | 2.52E-01 | 6.68E+01     | 2.55E-01 | 4.38E+01     |
| 2.85E-01 | 8.39E+01     | 3.10E-01 | 9.44E+01     | 2.60E-01 | 6.73E+01     | 2.63E-01 | 4.22E+01     |
| 2.94E-01 | 8.29E+01     | 3.20E-01 | 9.06E+01     | 2.68E-01 | 6.84E+01     | 2.72E-01 | 4.03E+01     |
| 3.03E-01 | 8.07E+01     | 3.30E-01 | 8.42E+01     | 2.77E-01 | 6.88E+01     | 2.80E-01 | 3.95E+01     |
| 3.13E-01 | 7.97E+01     | 3.40E-01 | 7.73E+01     | 2.85E-01 | 6.44E+01     | 2.88E-01 | 4.02E+01     |
| 3.22E-01 | 7.92E+01     | 3.50E-01 | 7.35E+01     | 2.93E-01 | 6.17E+01     | 2.97E-01 | 3.96E+01     |
| 3.31E-01 | 7.82E+01     | 3.60E-01 | 7.11E+01     | 3.02E-01 | 5.86E+01     | 3.05E-01 | 3.62E+01     |
| 3.40E-01 | 7.52E+01     | 3.70E-01 | 6.58E+01     | 3.10E-01 | 5.48E+01     | 3.14E-01 | 3.30E+01     |
| 3.49E-01 | 7.14E+01     | 3.80E-01 | 6.13E+01     | 3.19E-01 | 5.06E+01     | 3.22E-01 | 3.18E+01     |
| 3.58E-01 | 6.70E+01     | 3.90E-01 | 5.79E+01     | 3.27E-01 | 4.76E+01     | 3.31E-01 | 3.17E+01     |
| 3.68E-01 | 6.38E+01     | 4.00E-01 | 5.73E+01     | 3.35E-01 | 4.51E+01     | 3.39E-01 | 3.17E+01     |
| 3.77E-01 | 6.10E+01     | 4.10E-01 | 5.62E+01     | 3.44E-01 | 4.31E+01     | 3.48E-01 | 3.27E+01     |

|          |          |          |          |          |          |          |          |
|----------|----------|----------|----------|----------|----------|----------|----------|
| 3.86E-01 | 5.61E+01 | 4.20E-01 | 5.65E+01 | 3.52E-01 | 4.32E+01 | 3.56E-01 | 3.43E+01 |
| 3.95E-01 | 5.33E+01 | 4.30E-01 | 5.50E+01 | 3.61E-01 | 4.25E+01 | 3.65E-01 | 3.37E+01 |
| 4.04E-01 | 5.26E+01 | 4.40E-01 | 5.26E+01 | 3.69E-01 | 4.19E+01 | 3.73E-01 | 3.27E+01 |
| 4.14E-01 | 5.20E+01 | 4.50E-01 | 5.15E+01 | 3.77E-01 | 4.12E+01 | 3.82E-01 | 3.29E+01 |
| 4.23E-01 | 5.18E+01 | 4.60E-01 | 4.99E+01 | 3.86E-01 | 4.08E+01 | 3.90E-01 | 3.33E+01 |
| 4.32E-01 | 5.13E+01 | 4.70E-01 | 4.66E+01 | 3.94E-01 | 4.02E+01 | 3.99E-01 | 3.39E+01 |
| 4.41E-01 | 5.08E+01 | 4.80E-01 | 4.68E+01 | 4.02E-01 | 3.99E+01 | 4.07E-01 | 3.47E+01 |
| 4.50E-01 | 5.02E+01 | 4.90E-01 | 4.74E+01 | 4.11E-01 | 4.05E+01 | 4.16E-01 | 3.53E+01 |
| 4.60E-01 | 4.94E+01 | 5.00E-01 | 4.79E+01 | 4.19E-01 | 4.19E+01 | 4.24E-01 | 3.77E+01 |
| 4.69E-01 | 4.85E+01 | 5.10E-01 | 4.44E+01 | 4.28E-01 | 4.18E+01 | 4.33E-01 | 3.95E+01 |
| 4.78E-01 | 4.73E+01 | 5.20E-01 | 4.48E+01 | 4.36E-01 | 4.17E+01 | 4.41E-01 | 3.94E+01 |
| 4.87E-01 | 4.59E+01 | 5.30E-01 | 4.48E+01 | 4.44E-01 | 4.13E+01 | 4.50E-01 | 3.82E+01 |
| 4.96E-01 | 4.46E+01 | 5.40E-01 | 4.45E+01 | 4.53E-01 | 4.05E+01 | 4.58E-01 | 3.84E+01 |
| 5.06E-01 | 4.38E+01 | 5.50E-01 | 4.33E+01 | 4.61E-01 | 4.05E+01 | 4.67E-01 | 3.92E+01 |
| 5.15E-01 | 4.29E+01 | 5.60E-01 | 4.22E+01 | 4.69E-01 | 3.96E+01 | 4.75E-01 | 3.96E+01 |
| 5.24E-01 | 4.25E+01 | 5.70E-01 | 3.97E+01 | 4.78E-01 | 3.92E+01 | 4.84E-01 | 3.98E+01 |
| 5.33E-01 | 4.17E+01 | 5.80E-01 | 4.08E+01 | 4.86E-01 | 3.90E+01 | 4.92E-01 | 3.85E+01 |
| 5.42E-01 | 4.11E+01 | 5.90E-01 | 4.08E+01 | 4.95E-01 | 3.90E+01 | 5.01E-01 | 3.84E+01 |
| 5.52E-01 | 4.04E+01 | 6.00E-01 | 3.86E+01 | 5.03E-01 | 3.92E+01 | 5.09E-01 | 3.77E+01 |
| 5.61E-01 | 4.05E+01 | 6.10E-01 | 3.88E+01 | 5.11E-01 | 3.81E+01 | 5.18E-01 | 3.71E+01 |
| 5.70E-01 | 4.00E+01 | 6.20E-01 | 3.88E+01 | 5.20E-01 | 3.67E+01 | 5.26E-01 | 3.64E+01 |
| 5.79E-01 | 3.96E+01 | 6.30E-01 | 3.83E+01 | 5.28E-01 | 3.60E+01 | 5.35E-01 | 3.61E+01 |
| 5.88E-01 | 3.97E+01 | 6.40E-01 | 3.76E+01 | 5.37E-01 | 3.56E+01 | 5.43E-01 | 3.59E+01 |
| 5.97E-01 | 3.93E+01 | 6.50E-01 | 3.54E+01 | 5.45E-01 | 3.55E+01 | 5.52E-01 | 3.58E+01 |
| 6.07E-01 | 3.87E+01 | 6.60E-01 | 3.52E+01 | 5.53E-01 | 3.50E+01 | 5.60E-01 | 3.49E+01 |
| 6.16E-01 | 3.90E+01 | 6.70E-01 | 3.40E+01 | 5.62E-01 | 3.48E+01 | 5.68E-01 | 3.39E+01 |
| 6.25E-01 | 3.94E+01 | 6.80E-01 | 3.26E+01 | 5.70E-01 | 3.55E+01 | 5.77E-01 | 3.34E+01 |
| 6.34E-01 | 3.92E+01 | 6.90E-01 | 3.35E+01 | 5.78E-01 | 3.51E+01 | 5.85E-01 | 3.32E+01 |
| 6.43E-01 | 3.83E+01 | 7.00E-01 | 3.35E+01 | 5.87E-01 | 3.40E+01 | 5.94E-01 | 3.31E+01 |
| 6.53E-01 | 3.74E+01 | 7.10E-01 | 3.39E+01 | 5.95E-01 | 3.38E+01 | 6.02E-01 | 3.24E+01 |
| 6.62E-01 | 3.74E+01 | 7.20E-01 | 3.39E+01 | 6.04E-01 | 3.37E+01 | 6.11E-01 | 3.14E+01 |
| 6.71E-01 | 3.72E+01 | 7.30E-01 | 3.29E+01 | 6.12E-01 | 3.39E+01 | 6.19E-01 | 3.15E+01 |
| 6.80E-01 | 3.69E+01 | 7.40E-01 | 3.24E+01 | 6.20E-01 | 3.34E+01 | 6.28E-01 | 3.16E+01 |
| 6.89E-01 | 3.67E+01 | 7.50E-01 | 3.10E+01 | 6.29E-01 | 3.29E+01 | 6.36E-01 | 3.16E+01 |
| 6.99E-01 | 3.61E+01 | 7.60E-01 | 2.98E+01 | 6.37E-01 | 3.28E+01 | 6.45E-01 | 3.08E+01 |
| 7.08E-01 | 3.60E+01 | 7.70E-01 | 2.97E+01 | 6.46E-01 | 3.16E+01 | 6.53E-01 | 2.98E+01 |
| 7.17E-01 | 3.63E+01 | 7.80E-01 | 3.01E+01 | 6.54E-01 | 3.17E+01 | 6.62E-01 | 2.93E+01 |
| 7.26E-01 | 3.64E+01 | 7.90E-01 | 2.94E+01 | 6.62E-01 | 3.26E+01 | 6.70E-01 | 2.98E+01 |
| 7.35E-01 | 3.61E+01 | 8.00E-01 | 2.86E+01 | 6.71E-01 | 3.22E+01 | 6.79E-01 | 2.93E+01 |
| 7.45E-01 | 3.63E+01 | 8.10E-01 | 2.74E+01 | 6.79E-01 | 3.16E+01 | 6.87E-01 | 2.91E+01 |
| 7.54E-01 | 3.59E+01 | 8.20E-01 | 2.85E+01 | 6.87E-01 | 3.11E+01 | 6.96E-01 | 2.83E+01 |
| 7.63E-01 | 3.54E+01 | 8.30E-01 | 2.84E+01 | 6.96E-01 | 3.06E+01 | 7.04E-01 | 2.76E+01 |
| 7.72E-01 | 3.53E+01 | 8.40E-01 | 2.68E+01 | 7.04E-01 | 3.06E+01 | 7.13E-01 | 2.76E+01 |
| 7.81E-01 | 3.53E+01 | 8.50E-01 | 2.46E+01 | 7.13E-01 | 3.06E+01 | 7.21E-01 | 2.69E+01 |

|          |          |          |          |          |          |          |          |
|----------|----------|----------|----------|----------|----------|----------|----------|
| 7.91E-01 | 3.48E+01 | 8.60E-01 | 2.44E+01 | 7.21E-01 | 3.00E+01 | 7.30E-01 | 2.65E+01 |
| 8.00E-01 | 3.42E+01 | 8.70E-01 | 2.51E+01 | 7.29E-01 | 2.89E+01 | 7.38E-01 | 2.62E+01 |
| 8.09E-01 | 3.34E+01 | 8.80E-01 | 2.48E+01 | 7.38E-01 | 2.86E+01 | 7.47E-01 | 2.54E+01 |
| 8.18E-01 | 3.18E+01 | 8.90E-01 | 2.61E+01 | 7.46E-01 | 2.85E+01 | 7.55E-01 | 2.51E+01 |
| 8.27E-01 | 3.16E+01 | 9.00E-01 | 2.55E+01 | 7.55E-01 | 2.77E+01 | 7.64E-01 | 2.45E+01 |
| 8.36E-01 | 3.25E+01 | 9.10E-01 | 2.50E+01 | 7.63E-01 | 2.82E+01 | 7.72E-01 | 2.49E+01 |
| 8.46E-01 | 3.25E+01 | 9.20E-01 | 2.41E+01 | 7.71E-01 | 2.88E+01 | 7.81E-01 | 2.50E+01 |
| 8.55E-01 | 3.28E+01 | 9.30E-01 | 2.50E+01 | 7.80E-01 | 2.92E+01 | 7.89E-01 | 2.49E+01 |
| 8.64E-01 | 3.23E+01 | 9.40E-01 | 2.49E+01 | 7.88E-01 | 2.91E+01 | 7.98E-01 | 2.48E+01 |
| 8.73E-01 | 3.17E+01 | 9.50E-01 | 2.42E+01 | 7.96E-01 | 2.86E+01 | 8.06E-01 | 2.44E+01 |
| 8.82E-01 | 3.12E+01 | 9.60E-01 | 2.36E+01 | 8.05E-01 | 2.80E+01 | 8.15E-01 | 2.34E+01 |
| 8.92E-01 | 3.06E+01 | 9.70E-01 | 2.40E+01 | 8.13E-01 | 2.73E+01 | 8.23E-01 | 2.34E+01 |
| 9.01E-01 | 3.00E+01 | 9.80E-01 | 2.38E+01 | 8.22E-01 | 2.73E+01 | 8.32E-01 | 2.29E+01 |
| 9.10E-01 | 2.99E+01 | 9.90E-01 | 2.31E+01 | 8.30E-01 | 2.71E+01 | 8.40E-01 | 2.36E+01 |

| Group5   |              | Group6   |              | Group7   |              | Group8   |              |
|----------|--------------|----------|--------------|----------|--------------|----------|--------------|
| t [s]    | vp(t) [cm/s] |
| 0.00E+00 | 1.97E+01     | 0.00E+00 | 2.22E+01     | 0.00E+00 | 1.52E+01     | 0.00E+00 | 1.46E+01     |
| 8.18E-03 | 2.00E+01     | 7.07E-03 | 2.29E+01     | 8.59E-03 | 1.89E+01     | 9.90E-03 | 1.50E+01     |
| 1.64E-02 | 2.01E+01     | 1.41E-02 | 2.31E+01     | 1.72E-02 | 2.07E+01     | 1.98E-02 | 1.51E+01     |
| 2.45E-02 | 2.09E+01     | 2.12E-02 | 2.34E+01     | 2.58E-02 | 2.15E+01     | 2.97E-02 | 1.51E+01     |
| 3.27E-02 | 2.45E+01     | 2.83E-02 | 2.42E+01     | 3.43E-02 | 2.22E+01     | 3.96E-02 | 1.57E+01     |
| 4.09E-02 | 2.96E+01     | 3.54E-02 | 2.47E+01     | 4.29E-02 | 2.31E+01     | 4.95E-02 | 1.67E+01     |
| 4.91E-02 | 3.53E+01     | 4.24E-02 | 2.65E+01     | 5.15E-02 | 2.39E+01     | 5.94E-02 | 1.98E+01     |
| 5.73E-02 | 4.11E+01     | 4.95E-02 | 2.95E+01     | 6.01E-02 | 2.70E+01     | 6.93E-02 | 2.32E+01     |
| 6.55E-02 | 4.52E+01     | 5.66E-02 | 3.29E+01     | 6.87E-02 | 3.14E+01     | 7.92E-02 | 2.89E+01     |
| 7.36E-02 | 4.93E+01     | 6.36E-02 | 3.67E+01     | 7.73E-02 | 3.80E+01     | 8.91E-02 | 3.97E+01     |
| 8.18E-02 | 5.54E+01     | 7.07E-02 | 4.11E+01     | 8.59E-02 | 4.53E+01     | 9.90E-02 | 5.18E+01     |
| 9.00E-02 | 5.77E+01     | 7.78E-02 | 4.53E+01     | 9.44E-02 | 5.07E+01     | 1.09E-01 | 5.86E+01     |
| 9.82E-02 | 5.96E+01     | 8.48E-02 | 4.89E+01     | 1.03E-01 | 5.38E+01     | 1.19E-01 | 5.68E+01     |
| 1.06E-01 | 6.01E+01     | 9.19E-02 | 5.27E+01     | 1.12E-01 | 5.49E+01     | 1.29E-01 | 5.44E+01     |
| 1.15E-01 | 6.05E+01     | 9.90E-02 | 5.60E+01     | 1.20E-01 | 5.43E+01     | 1.39E-01 | 5.32E+01     |
| 1.23E-01 | 6.13E+01     | 1.06E-01 | 5.88E+01     | 1.29E-01 | 5.37E+01     | 1.48E-01 | 4.97E+01     |
| 1.31E-01 | 6.18E+01     | 1.13E-01 | 6.16E+01     | 1.37E-01 | 5.24E+01     | 1.58E-01 | 4.60E+01     |
| 1.39E-01 | 6.15E+01     | 1.20E-01 | 6.20E+01     | 1.46E-01 | 5.11E+01     | 1.68E-01 | 4.47E+01     |
| 1.47E-01 | 5.78E+01     | 1.27E-01 | 6.03E+01     | 1.55E-01 | 4.98E+01     | 1.78E-01 | 4.47E+01     |
| 1.55E-01 | 5.57E+01     | 1.34E-01 | 5.72E+01     | 1.63E-01 | 4.78E+01     | 1.88E-01 | 4.47E+01     |
| 1.64E-01 | 5.51E+01     | 1.41E-01 | 5.34E+01     | 1.72E-01 | 4.69E+01     | 1.98E-01 | 4.46E+01     |
| 1.72E-01 | 5.45E+01     | 1.48E-01 | 5.23E+01     | 1.80E-01 | 4.72E+01     | 2.08E-01 | 4.51E+01     |
| 1.80E-01 | 5.40E+01     | 1.56E-01 | 5.31E+01     | 1.89E-01 | 4.74E+01     | 2.18E-01 | 4.71E+01     |
| 1.88E-01 | 5.33E+01     | 1.63E-01 | 5.58E+01     | 1.97E-01 | 4.77E+01     | 2.28E-01 | 4.82E+01     |
| 1.96E-01 | 5.19E+01     | 1.70E-01 | 5.97E+01     | 2.06E-01 | 4.78E+01     | 2.38E-01 | 4.85E+01     |
| 2.05E-01 | 5.05E+01     | 1.77E-01 | 6.06E+01     | 2.15E-01 | 4.79E+01     | 2.47E-01 | 4.83E+01     |
| 2.13E-01 | 5.10E+01     | 1.84E-01 | 5.80E+01     | 2.23E-01 | 4.79E+01     | 2.57E-01 | 4.81E+01     |

|          |          |          |          |          |          |          |          |
|----------|----------|----------|----------|----------|----------|----------|----------|
| 2.21E-01 | 5.08E+01 | 1.91E-01 | 4.88E+01 | 2.32E-01 | 4.76E+01 | 2.67E-01 | 4.96E+01 |
| 2.29E-01 | 5.00E+01 | 1.98E-01 | 4.40E+01 | 2.40E-01 | 4.69E+01 | 2.77E-01 | 5.03E+01 |
| 2.37E-01 | 4.97E+01 | 2.05E-01 | 4.17E+01 | 2.49E-01 | 4.66E+01 | 2.87E-01 | 4.75E+01 |
| 2.45E-01 | 4.97E+01 | 2.12E-01 | 4.10E+01 | 2.58E-01 | 4.67E+01 | 2.97E-01 | 4.55E+01 |
| 2.54E-01 | 4.97E+01 | 2.19E-01 | 4.06E+01 | 2.66E-01 | 4.71E+01 | 3.07E-01 | 4.48E+01 |
| 2.62E-01 | 4.95E+01 | 2.26E-01 | 4.01E+01 | 2.75E-01 | 4.72E+01 | 3.17E-01 | 4.41E+01 |
| 2.70E-01 | 4.88E+01 | 2.33E-01 | 3.78E+01 | 2.83E-01 | 4.67E+01 | 3.27E-01 | 4.14E+01 |
| 2.78E-01 | 4.80E+01 | 2.40E-01 | 3.55E+01 | 2.92E-01 | 4.57E+01 | 3.37E-01 | 3.88E+01 |
| 2.86E-01 | 4.73E+01 | 2.47E-01 | 3.44E+01 | 3.01E-01 | 4.46E+01 | 3.46E-01 | 3.49E+01 |
| 2.95E-01 | 4.66E+01 | 2.55E-01 | 3.45E+01 | 3.09E-01 | 4.36E+01 | 3.56E-01 | 3.11E+01 |
| 3.03E-01 | 4.57E+01 | 2.62E-01 | 3.42E+01 | 3.18E-01 | 4.23E+01 | 3.66E-01 | 2.96E+01 |
| 3.11E-01 | 4.47E+01 | 2.69E-01 | 3.26E+01 | 3.26E-01 | 4.14E+01 | 3.76E-01 | 2.84E+01 |
| 3.19E-01 | 4.36E+01 | 2.76E-01 | 3.11E+01 | 3.35E-01 | 3.99E+01 | 3.86E-01 | 2.71E+01 |
| 3.27E-01 | 4.13E+01 | 2.83E-01 | 3.03E+01 | 3.43E-01 | 3.82E+01 | 3.96E-01 | 2.67E+01 |
| 3.35E-01 | 3.85E+01 | 2.90E-01 | 2.99E+01 | 3.52E-01 | 3.59E+01 | 4.06E-01 | 2.68E+01 |
| 3.44E-01 | 3.55E+01 | 2.97E-01 | 2.91E+01 | 3.61E-01 | 3.26E+01 | 4.16E-01 | 2.71E+01 |
| 3.52E-01 | 3.26E+01 | 3.04E-01 | 2.76E+01 | 3.69E-01 | 2.75E+01 | 4.26E-01 | 2.85E+01 |
| 3.60E-01 | 3.15E+01 | 3.11E-01 | 2.69E+01 | 3.78E-01 | 2.43E+01 | 4.36E-01 | 2.93E+01 |
| 3.68E-01 | 3.15E+01 | 3.18E-01 | 2.65E+01 | 3.86E-01 | 2.32E+01 | 4.45E-01 | 3.02E+01 |
| 3.76E-01 | 3.06E+01 | 3.25E-01 | 2.59E+01 | 3.95E-01 | 2.33E+01 | 4.55E-01 | 3.05E+01 |
| 3.85E-01 | 3.06E+01 | 3.32E-01 | 2.55E+01 | 4.04E-01 | 2.54E+01 | 4.65E-01 | 3.05E+01 |
| 3.93E-01 | 3.10E+01 | 3.39E-01 | 2.61E+01 | 4.12E-01 | 2.80E+01 | 4.75E-01 | 3.00E+01 |
| 4.01E-01 | 3.16E+01 | 3.46E-01 | 2.67E+01 | 4.21E-01 | 2.95E+01 | 4.85E-01 | 2.98E+01 |
| 4.09E-01 | 3.28E+01 | 3.54E-01 | 2.67E+01 | 4.29E-01 | 3.00E+01 | 4.95E-01 | 2.94E+01 |
| 4.17E-01 | 3.41E+01 | 3.61E-01 | 2.66E+01 | 4.38E-01 | 2.92E+01 | 5.05E-01 | 2.79E+01 |
| 4.25E-01 | 3.48E+01 | 3.68E-01 | 2.68E+01 | 4.46E-01 | 2.83E+01 | 5.15E-01 | 2.74E+01 |
| 4.34E-01 | 3.47E+01 | 3.75E-01 | 2.72E+01 | 4.55E-01 | 2.78E+01 | 5.25E-01 | 2.72E+01 |
| 4.42E-01 | 3.45E+01 | 3.82E-01 | 2.76E+01 | 4.64E-01 | 2.61E+01 | 5.35E-01 | 2.69E+01 |
| 4.50E-01 | 3.49E+01 | 3.89E-01 | 2.84E+01 | 4.72E-01 | 2.45E+01 | 5.44E-01 | 2.62E+01 |
| 4.58E-01 | 3.49E+01 | 3.96E-01 | 2.86E+01 | 4.81E-01 | 2.38E+01 | 5.54E-01 | 2.50E+01 |
| 4.66E-01 | 3.46E+01 | 4.03E-01 | 2.91E+01 | 4.89E-01 | 2.31E+01 | 5.64E-01 | 2.44E+01 |
| 4.75E-01 | 3.46E+01 | 4.10E-01 | 3.04E+01 | 4.98E-01 | 2.24E+01 | 5.74E-01 | 2.37E+01 |
| 4.83E-01 | 3.45E+01 | 4.17E-01 | 3.12E+01 | 5.07E-01 | 2.13E+01 | 5.84E-01 | 2.30E+01 |
| 4.91E-01 | 3.42E+01 | 4.24E-01 | 3.19E+01 | 5.15E-01 | 2.09E+01 | 5.94E-01 | 2.28E+01 |
| 4.99E-01 | 3.37E+01 | 4.31E-01 | 3.17E+01 | 5.24E-01 | 2.10E+01 | 6.04E-01 | 2.26E+01 |
| 5.07E-01 | 3.34E+01 | 4.38E-01 | 3.14E+01 | 5.32E-01 | 2.08E+01 | 6.14E-01 | 2.20E+01 |
| 5.15E-01 | 3.34E+01 | 4.45E-01 | 3.14E+01 | 5.41E-01 | 2.07E+01 | 6.24E-01 | 2.16E+01 |
| 5.24E-01 | 3.31E+01 | 4.53E-01 | 3.13E+01 | 5.49E-01 | 2.06E+01 | 6.34E-01 | 2.11E+01 |
| 5.32E-01 | 3.21E+01 | 4.60E-01 | 3.11E+01 | 5.58E-01 | 2.04E+01 | 6.43E-01 | 2.08E+01 |
| 5.40E-01 | 3.15E+01 | 4.67E-01 | 3.08E+01 | 5.67E-01 | 2.02E+01 | 6.53E-01 | 2.00E+01 |
| 5.48E-01 | 3.08E+01 | 4.74E-01 | 3.08E+01 | 5.75E-01 | 1.99E+01 | 6.63E-01 | 1.99E+01 |
| 5.56E-01 | 2.99E+01 | 4.81E-01 | 3.09E+01 | 5.84E-01 | 1.94E+01 | 6.73E-01 | 2.01E+01 |
| 5.65E-01 | 2.94E+01 | 4.88E-01 | 3.08E+01 | 5.92E-01 | 1.86E+01 | 6.83E-01 | 1.96E+01 |
| 5.73E-01 | 2.89E+01 | 4.95E-01 | 3.08E+01 | 6.01E-01 | 1.84E+01 | 6.93E-01 | 1.89E+01 |

|          |          |          |          |          |          |          |          |
|----------|----------|----------|----------|----------|----------|----------|----------|
| 5.81E-01 | 2.79E+01 | 5.02E-01 | 3.00E+01 | 6.10E-01 | 1.81E+01 | 7.03E-01 | 1.86E+01 |
| 5.89E-01 | 2.80E+01 | 5.09E-01 | 2.97E+01 | 6.18E-01 | 1.81E+01 | 7.13E-01 | 1.83E+01 |
| 5.97E-01 | 2.75E+01 | 5.16E-01 | 2.90E+01 | 6.27E-01 | 1.79E+01 | 7.23E-01 | 1.81E+01 |
| 6.05E-01 | 2.69E+01 | 5.23E-01 | 2.87E+01 | 6.35E-01 | 1.78E+01 | 7.33E-01 | 1.78E+01 |
| 6.14E-01 | 2.66E+01 | 5.30E-01 | 2.82E+01 | 6.44E-01 | 1.77E+01 | 7.42E-01 | 1.76E+01 |
| 6.22E-01 | 2.66E+01 | 5.37E-01 | 2.78E+01 | 6.53E-01 | 1.77E+01 | 7.52E-01 | 1.76E+01 |
| 6.30E-01 | 2.64E+01 | 5.44E-01 | 2.76E+01 | 6.61E-01 | 1.77E+01 | 7.62E-01 | 1.71E+01 |
| 6.38E-01 | 2.59E+01 | 5.52E-01 | 2.78E+01 | 6.70E-01 | 1.75E+01 | 7.72E-01 | 1.67E+01 |
| 6.46E-01 | 2.53E+01 | 5.59E-01 | 2.80E+01 | 6.78E-01 | 1.73E+01 | 7.82E-01 | 1.57E+01 |
| 6.55E-01 | 2.48E+01 | 5.66E-01 | 2.82E+01 | 6.87E-01 | 1.66E+01 | 7.92E-01 | 1.61E+01 |
| 6.63E-01 | 2.46E+01 | 5.73E-01 | 2.79E+01 | 6.95E-01 | 1.63E+01 | 8.02E-01 | 1.62E+01 |
| 6.71E-01 | 2.47E+01 | 5.80E-01 | 2.72E+01 | 7.04E-01 | 1.65E+01 | 8.12E-01 | 1.66E+01 |
| 6.79E-01 | 2.48E+01 | 5.87E-01 | 2.66E+01 | 7.13E-01 | 1.65E+01 | 8.22E-01 | 1.64E+01 |
| 6.87E-01 | 2.46E+01 | 5.94E-01 | 2.63E+01 | 7.21E-01 | 1.65E+01 | 8.32E-01 | 1.63E+01 |
| 6.95E-01 | 2.49E+01 | 6.01E-01 | 2.59E+01 | 7.30E-01 | 1.63E+01 | 8.41E-01 | 1.61E+01 |
| 7.04E-01 | 2.54E+01 | 6.08E-01 | 2.46E+01 | 7.38E-01 | 1.58E+01 | 8.51E-01 | 1.57E+01 |
| 7.12E-01 | 2.55E+01 | 6.15E-01 | 2.38E+01 | 7.47E-01 | 1.58E+01 | 8.61E-01 | 1.57E+01 |
| 7.20E-01 | 2.53E+01 | 6.22E-01 | 2.37E+01 | 7.56E-01 | 1.59E+01 | 8.71E-01 | 1.58E+01 |
| 7.28E-01 | 2.54E+01 | 6.29E-01 | 2.37E+01 | 7.64E-01 | 1.57E+01 | 8.81E-01 | 1.56E+01 |
| 7.36E-01 | 2.52E+01 | 6.36E-01 | 2.37E+01 | 7.73E-01 | 1.55E+01 | 8.91E-01 | 1.56E+01 |
| 7.45E-01 | 2.54E+01 | 6.43E-01 | 2.36E+01 | 7.81E-01 | 1.52E+01 | 9.01E-01 | 1.54E+01 |
| 7.53E-01 | 2.40E+01 | 6.51E-01 | 2.33E+01 | 7.90E-01 | 1.50E+01 | 9.11E-01 | 1.51E+01 |
| 7.61E-01 | 2.27E+01 | 6.58E-01 | 2.30E+01 | 7.98E-01 | 1.49E+01 | 9.21E-01 | 1.47E+01 |
| 7.69E-01 | 2.15E+01 | 6.65E-01 | 2.26E+01 | 8.07E-01 | 1.48E+01 | 9.31E-01 | 1.45E+01 |
| 7.77E-01 | 2.14E+01 | 6.72E-01 | 2.23E+01 | 8.16E-01 | 1.44E+01 | 9.40E-01 | 1.48E+01 |
| 7.85E-01 | 2.15E+01 | 6.79E-01 | 2.24E+01 | 8.24E-01 | 1.42E+01 | 9.50E-01 | 1.46E+01 |
| 7.94E-01 | 2.15E+01 | 6.86E-01 | 2.23E+01 | 8.33E-01 | 1.42E+01 | 9.60E-01 | 1.39E+01 |
| 8.02E-01 | 2.19E+01 | 6.93E-01 | 2.19E+01 | 8.41E-01 | 1.40E+01 | 9.70E-01 | 1.37E+01 |
| 8.10E-01 | 2.19E+01 | 7.00E-01 | 2.19E+01 | 8.50E-01 | 1.36E+01 | 9.80E-01 | 1.37E+01 |
